# Supplementary material for: Temperature responsive behavior of polymer brush/polyelectrolyte multilayer composites
Source: Royal Society of Chemistry journal article supplement (doi:10.1039/c5sm02256h), 2015-11-16
Supplement: c5sm02256h1.pdf [file c5sm02256h1.pdf]

# Supporting information of

## Temperature responsive behavior of polymer brush/polyelectrolyte multilayer composites

Samantha Micciulla,<sup>†</sup> Olaf Soltwedel,<sup>‡</sup> Oliver Löhmann,<sup>†</sup> and Regine von  
Klitzing<sup>\*,†</sup>

*Stranski-Laboratorium, Institut für Chemie, Technische Universität Berlin, Strasse des 17. Juni  
124, D-10623 Berlin, Germany, and Max-Planck-Institute for Solid State Research, Outstation at  
MLZ, Lichtenbergstr. 1, 85747 Garching, Germany*

E-mail: klitzing@chem.tu-berlin.de

Table S1: Density of D<sub>2</sub>O as a function of temperature taken from Ref. 1 and calculated scattering length density (SLD) values from the calculator available in the Motofit package of Igor.

| Temperature [°C] | Density [g/cm <sup>3</sup> ] | SLD (10 <sup>-6</sup> ) [Å <sup>-2</sup> ] |
|------------------|------------------------------|--------------------------------------------|
| 15               | 1.1059                       | 6.36                                       |
| 35               | 1.1017                       | 6.34                                       |
| 65               | 1.0878                       | 6.26                                       |

---

\*To whom correspondence should be addressed

<sup>†</sup>Technische Universität Berlin

<sup>‡</sup>Max-Planck-Institute for Solid State Research, Outstation at MLZ, Lichtenbergstr. 1, 85747 Garching, Germany

Table S2: Fitting parameters thickness  $d$ , scattering length density  $SLD$  and roughness,  $\sigma$ , obtained from the fit of the reflectivity curves. Silicon substrate ( $SLD= 2.07 \cdot 10^{-6}$ ), silicon dioxide ( $SLD=3.46 \cdot 10^{-6}$ ) and  $D_2O$  ( $SLD= 6.36/6.34/6.26 \cdot 10^{-6}$ ) were kept fixed for all fits. The layer number is counted from the silicon substrate to the  $D_2O$  medium.

| P(NIPAM-b-DMAEMA)                            |           |         |                                        |              |
|----------------------------------------------|-----------|---------|----------------------------------------|--------------|
| Temperature [°C]                             | No. layer | $d$ [Å] | $SLD$ ( $10^{-6}$ ) [Å <sup>-2</sup> ] | $\sigma$ [Å] |
| 15                                           | 1         | 1288    | 4.18                                   | 134          |
|                                              | 2         | 177     | 5.81                                   | 49           |
|                                              | 3         | 470     | 6.15                                   | 53           |
| 35                                           | 1         | 571     | 3.38                                   | 126          |
|                                              | 2         | 504     | 5.49                                   | 55           |
| 65                                           | 1         | 572     | 2.65                                   | 50           |
|                                              | 2         | 73      | 4.17                                   | 14           |
|                                              | 3         | 478     | 6.17                                   | 19           |
| P(NIPAM-b-DMAEMA)(dPSS/PDADMAC) <sub>2</sub> |           |         |                                        |              |
| Temperature [°C]                             | No. layer | $d$ [Å] | $SLD$ ( $10^{-6}$ ) [Å <sup>-2</sup> ] | $\sigma$ [Å] |
| 15                                           | 1         | 381     | 3.95                                   | 123          |
|                                              | 2         | 340     | 5.24                                   | 77           |
|                                              | 3         | 336     | 5.50                                   | 62           |
| 35                                           | 1         | 385     | 3.57                                   | 44           |
|                                              | 2         | 80      | 4.21                                   | 21           |
|                                              | 3         | 365     | 4.59                                   | 62           |
| 65                                           | 1         | 285     | 2.25                                   | 17           |
|                                              | 2         | 81      | 2.88                                   | 47           |
|                                              | 3         | 300     | 4.26                                   | 16           |

## References

- (1) De Podesta, M. *Understanding the properties of matter*; Routledge Chapman and Hall, 2002; Vol. 2; p 277.
